# Supplementary material
Source: Springer Nature journal article supplement (https://www.springermedizin.de/resource/supplementary/12884_2010_345_MOESM1_ESM.pdf/9457492)
Supplement: MOESM1 [file 9457492]

## MADE-IN

RTs recorded WRA deaths with information on PR status

Kaders recorded WRA deaths with information on PR status

Listing meeting → *compiled list of 'possible' PRDs*

Listing meeting → *compiled list of 'possible' PRDs*

Data matching → *final compiled list of 'possible' PRDs*

## MADE-FOR

Confirmation visit → *final list of eligible PRDs*
